# Supplementary material for: First-principles study of the discharge electrochemical and catalytic performance of the sulfur cathode host Fe0.875M0.125S2 (M = Ti, V)
Source: Royal Society of Chemistry journal article supplement (doi:10.1039/d3cp04694j), 2023-12-12

## “Supporting Information”

### **First-principles study on discharge electrochemical and catalytic performance of sulfur cathode host $\text{Fe}_{0.875}\text{M}_{0.125}\text{S}_2$ (M = Ti, V)**

Cheng-Dong Wei<sup>a</sup>, Hong-Tao Xue<sup>a,b</sup>, Yu-Xia Hu<sup>a</sup>, Qing-Shan Zhao<sup>a</sup>, Fu-Ling Tang<sup>a,b\*</sup>

<sup>a</sup> *School of Materials Science and Engineering, Lanzhou University of Technology, Lanzhou 730050, China*

<sup>b</sup> *State Key Laboratory of Advanced Processing and Recycling of Non-ferrous Metals, Lanzhou University of Technology, Lanzhou 730050, China*

\* Corresponding author.

E-mail address: tfl@lut.edu.cn (F. L. Tang)

**Table S1.** The lattice constant of  $\text{Li}_2\text{FeS}_2$  with different space groups

| $\text{Li}_2\text{FeS}_2$ | $a$ (Å) | $b$   | $c$   | $\alpha$ (°) | $\beta$ | $\gamma$ |
|---------------------------|---------|-------|-------|--------------|---------|----------|
| <i>Ibam</i>               | 5.87    | 10.03 | 5.08  | 90.00        | 90.00   | 90.00    |
| <i>Immm</i>               | 3.39    | 4.66  | 11.04 | 90.00        | 90.00   | 90.00    |
| <i>P3m1</i>               | 3.89    | 3.89  | 6.21  | 90.00        | 90.00   | 120.00   |
| $\bar{P}3m1$              | 3.81    | 3.81  | 6.08  | 90.00        | 90.00   | 120.00   |
| <i>P2<sub>1</sub>/c</i>   | 6.71    | 6.38  | 8.12  | 90.00        | 92.83   | 90.00    |
| <i>P42mcn</i>             | 5.77    | 5.77  | 5.69  | 90.00        | 90.00   | 90.00    |

**Table S2.** Chemical potentials for elements in  $\text{Li}_2\text{Fe}_{0.875}\text{M}_{0.125}\text{S}_2$ 

| $\mu_{\text{M}}$ | Ti     | V      | Fe     | Li     | S      |
|------------------|--------|--------|--------|--------|--------|
| DFT              | -7.834 | -8.988 | -8.309 | -1.875 | -4.113 |
| Ref              | -7.770 | -8.941 | -8.308 | -1.897 | -4.114 |

**Table S3.** Formation energy of Fe in  $\text{Li}_2\text{FeS}_2$  substituted by M atom (M = Ti, V)

| $\text{Li}_2\text{FeS}_2$                                 | <i>Ibam</i> | <i>Immm</i> | <i>P3m1</i> | $\bar{P}3m1$ | <i>P2<sub>1</sub>/c</i> | <i>P42mcn</i> |
|-----------------------------------------------------------|-------------|-------------|-------------|--------------|-------------------------|---------------|
| $\text{Li}_2\text{Fe}_{0.875}\text{Ti}_{0.125}\text{S}_2$ | -2.57       | -1.69       | -0.76       | -2.77        | -2.34                   | -0.10         |
| $\text{Li}_2\text{Fe}_{0.875}\text{V}_{0.125}\text{S}_2$  | -3.49       | -0.64       | -0.81       | -0.80        | -1.23                   | -0.57         |

**Figure S1.** The structures of  $\text{Li}_2\text{FeS}_2$  with different  $Ibam$  (a),  $Immm$  (b),  $P3m1$  (c),  $P\bar{3}m1$  (d),  $P2_1/c$  (e) and  $P42mcm$  (f) space groups. (yellow, pink and green are for S, Fe and Li atoms.)

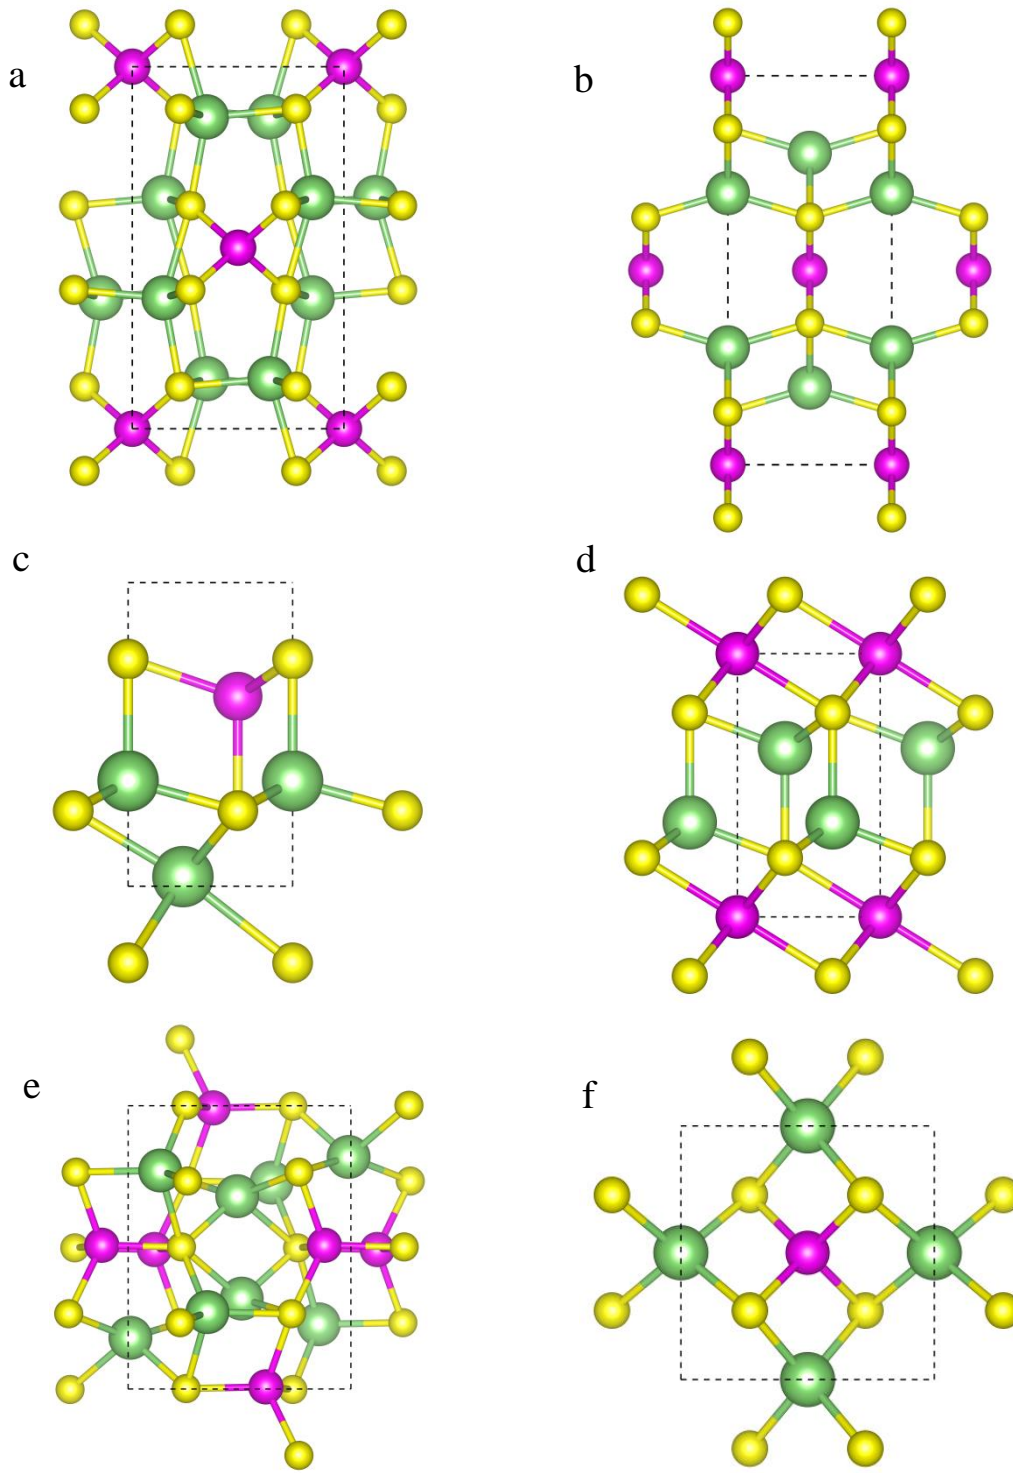

**Figure S2.** The formation energy of mixing enthalpy of  $\text{Li}_{1-x}(\text{Fe}_{0.875}\text{Ti}_{0.125})_{1/2}\text{S}$  with different *Ibam* (a), *Immm* (c), *P3m1* (e),  $\bar{P}3m1$  (g), *P2<sub>1</sub>/c* (i) and *P42mcm* (m) is a function of Li concentration; the voltage of  $\text{Li}_{1-x}(\text{Fe}_{0.875}\text{Ti}_{0.125})_{1/2}\text{S}$  with different *Ibam* (b), *Immm* (d), *P3m1* (f),  $\bar{P}3m1$  (h), *P2<sub>1</sub>/c* (j) and *P42mcm* (n) increases with the increase of theoretical capacity.

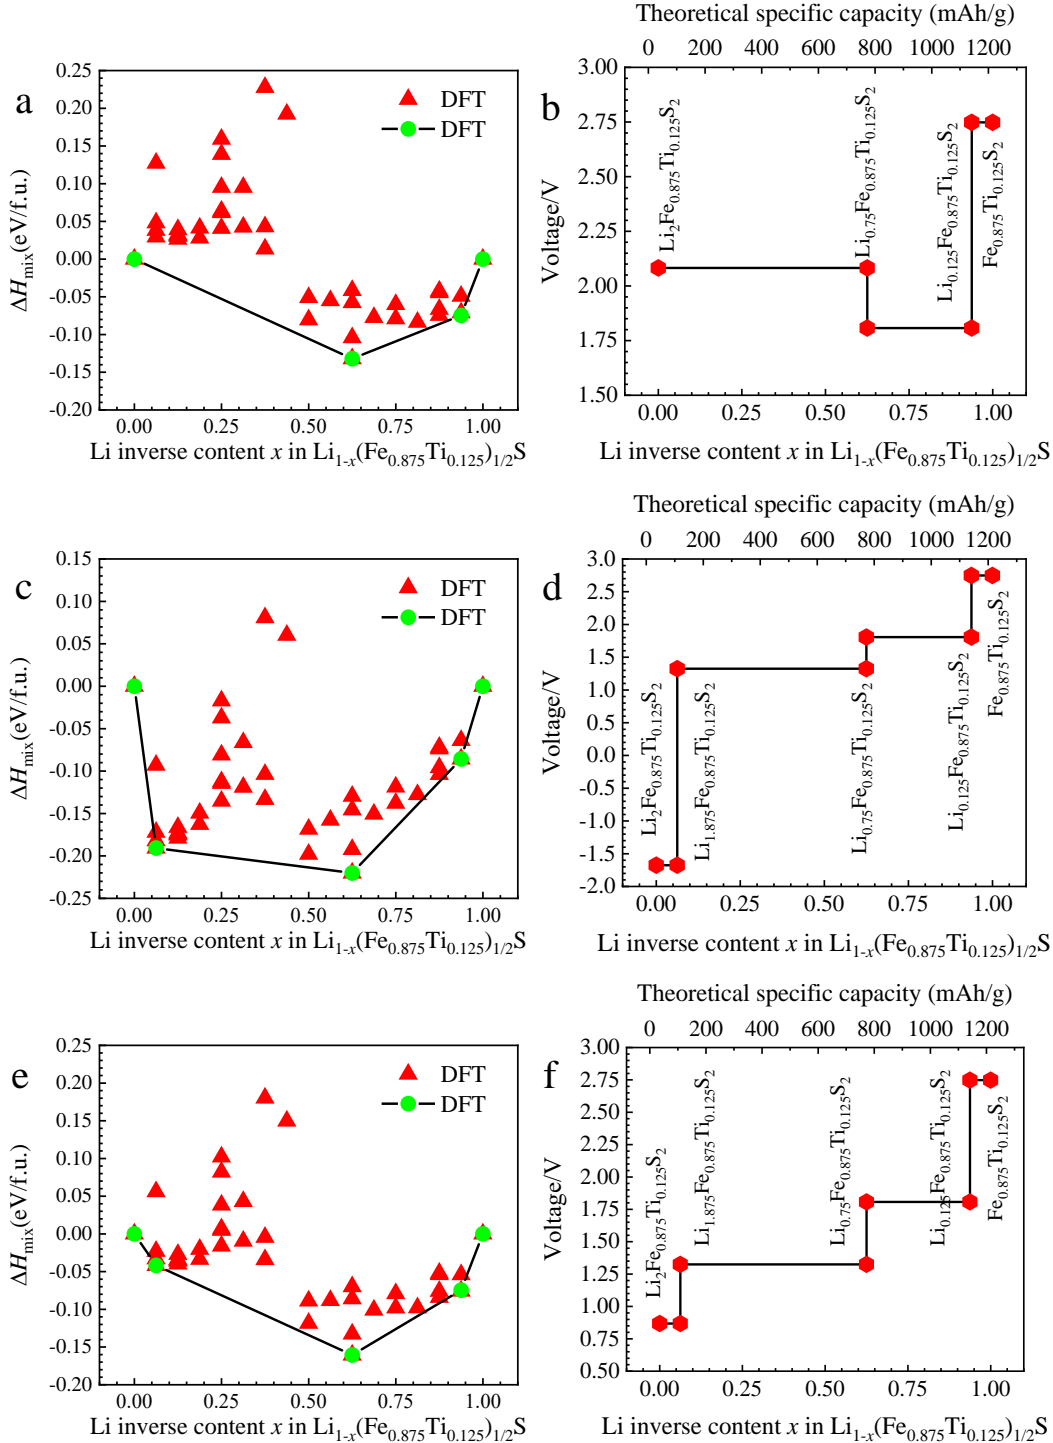

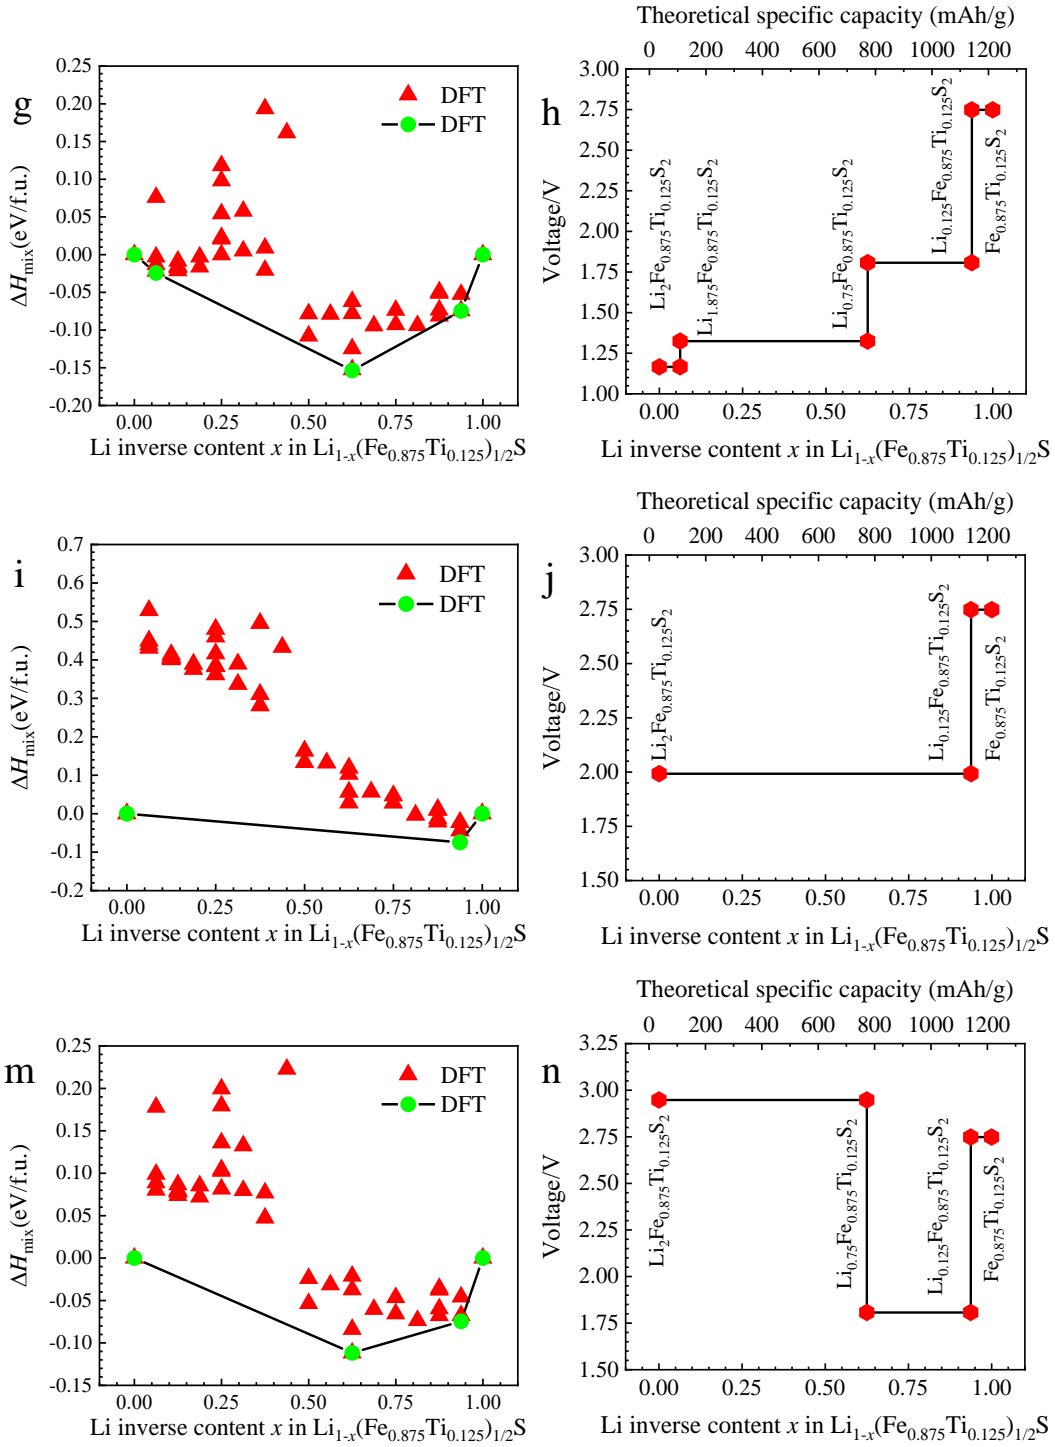

**Figure S3.** The formation energy of mixing enthalpy of  $\text{Li}_{1-x}(\text{Fe}_{0.875}\text{V}_{0.125})_{1/2}\text{S}$  with different *Ibam* (a), *Immm* (c), *P3m1* (e),  $\bar{P}3m1$  (g), *P2<sub>1</sub>/c* (i) and *P42mcm* (m) is a function of Li concentration; the voltage of  $\text{Li}_{1-x}(\text{Fe}_{0.875}\text{V}_{0.125})_{1/2}\text{S}$  with different *Ibam* (b), *Immm* (d), *P3m1* (f),  $\bar{P}3m1$  (h), *P2<sub>1</sub>/c* (j) and *P42mcm* (n) increases with the increase of theoretical capacity.

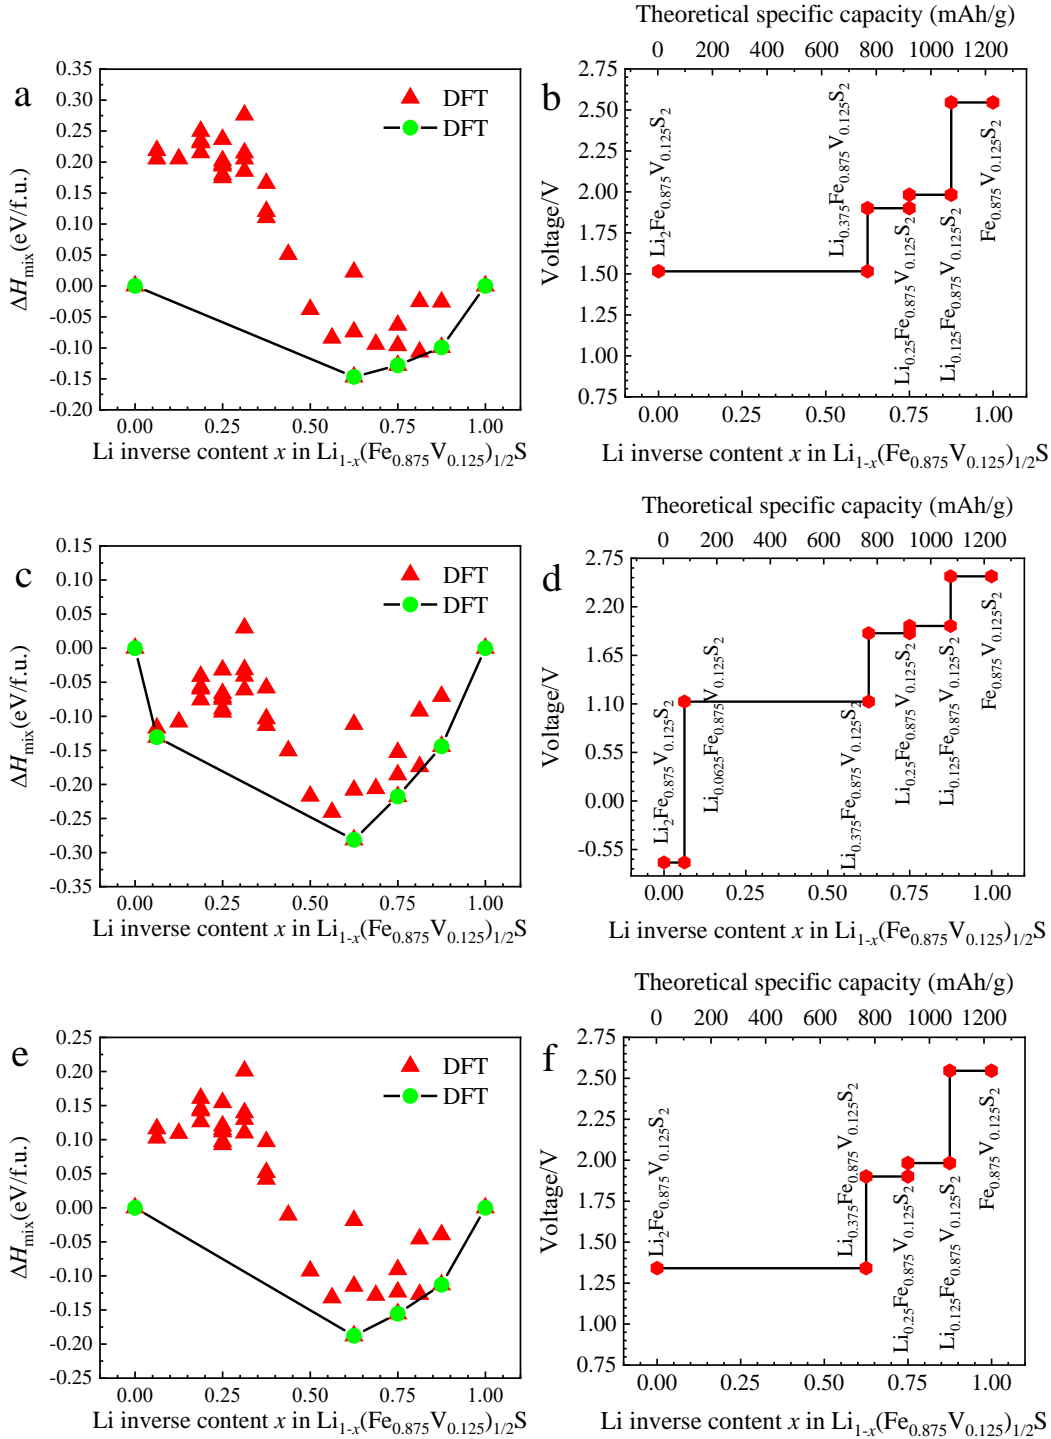

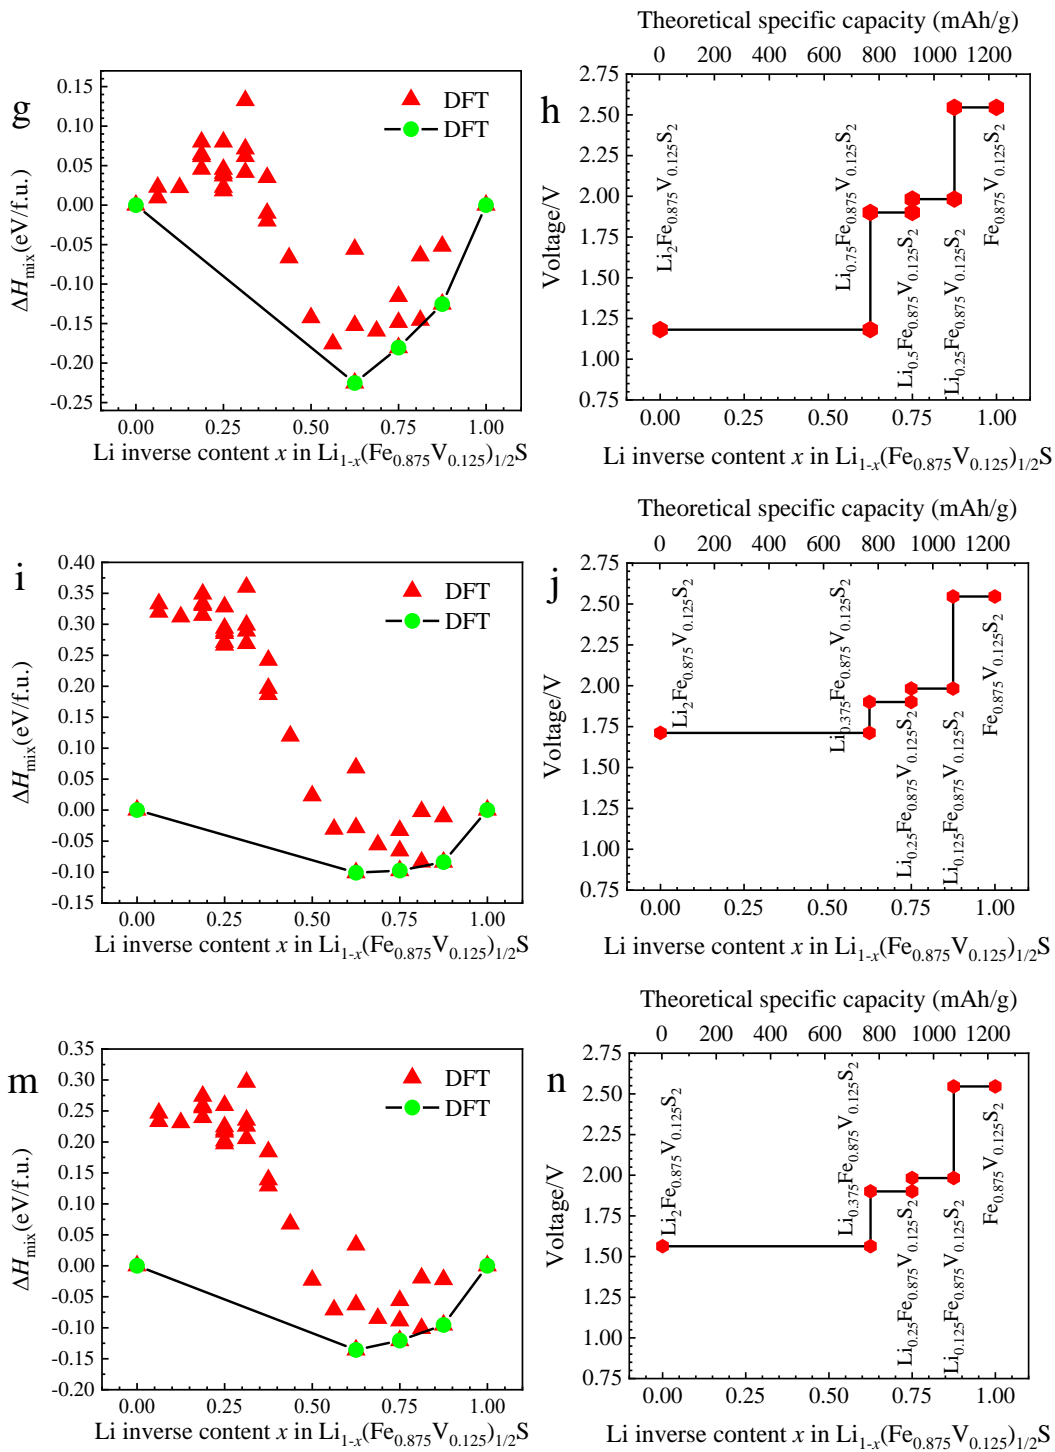

**Table S4.** Lattice parameters and atomic position for  $\text{Li}_{1-x}(\text{Fe}_{0.875}\text{Ti}_{0.125})_{1/2}\text{S}$ 

| Space group                                                           | $a$ (Å)       | $b$         | $c$         | $\alpha$ (°) | $\beta$     | $\gamma$   |  |
|-----------------------------------------------------------------------|---------------|-------------|-------------|--------------|-------------|------------|--|
| $P\bar{3}m1$                                                          | 7.5359        | 7.5359      | 12.0754     | 90           | 90          | 120        |  |
|                                                                       | Atom position |             |             |              |             |            |  |
| $\text{Li}_2\text{Fe}_{0.875}\text{Ti}_{0.125}\text{S}_2$             | Fe1           | 0.50000000  |             | 0.50000000   | 0.00000000  | 0.00000000 |  |
|                                                                       | Fe2           | 0.50000000  |             | 0.00000000   | 0.00000000  | 0.00000000 |  |
|                                                                       | Fe3           | 0.00000000  |             | 0.50000000   | 0.00000000  | 0.00000000 |  |
|                                                                       | Fe4           | 0.00000000  |             | 0.00000000   | 0.00000000  | 0.00000000 |  |
|                                                                       | Fe5           | 0.50000000  |             | 0.50000000   | 0.50000000  | 0.50000000 |  |
|                                                                       | Fe6           | 0.50000000  |             | 0.00000000   | 0.50000000  | 0.50000000 |  |
|                                                                       | Fe7           | 0.00000000  |             | 0.50000000   | 0.50000000  | 0.50000000 |  |
|                                                                       | Li1           | 0.834079981 |             | 0.668160021  | 0.178360000 |            |  |
|                                                                       | Li2           | 0.165920019 |             | 0.331839979  | 0.821640015 |            |  |
|                                                                       | Li3           | 0.331839979 |             | 0.165919960  | 0.178360000 |            |  |
|                                                                       | Li4           | 0.668160021 |             | 0.834080040  | 0.821640015 |            |  |
|                                                                       | Li5           | 0.834080040 |             | 0.165920019  | 0.178360000 |            |  |
|                                                                       | Li6           | 0.165919960 |             | 0.834079981  | 0.821640015 |            |  |
|                                                                       | Li7           | 0.660610020 |             | 0.830299973  | 0.315340012 |            |  |
|                                                                       | Li8           | 0.339389980 |             | 0.169700027  | 0.684659958 |            |  |
|                                                                       | Li9           | 0.169700027 |             | 0.830310047  | 0.315340012 |            |  |
|                                                                       | Li10          | 0.830299973 |             | 0.169689953  | 0.684659958 |            |  |
| Li11                                                                  | 0.169689953   |             | 0.339389980 | 0.315340012  |             |            |  |
| Li12                                                                  | 0.830310047   |             | 0.660610020 | 0.684659958  |             |            |  |
| Li13                                                                  | 0.333333373   |             | 0.666666687 | 0.179380000  |             |            |  |
| Li14                                                                  | 0.666666627   |             | 0.333333313 | 0.820620000  |             |            |  |
| Li15                                                                  | 0.666666687   |             | 0.333333373 | 0.321550012  |             |            |  |
| Li16                                                                  | 0.333333313   |             | 0.666666627 | 0.678449988  |             |            |  |
| S1                                                                    | 0.832710028   |             | 0.665409982 | 0.887520015  |             |            |  |
| S2                                                                    | 0.167289972   |             | 0.334590018 | 0.112479985  |             |            |  |
| S3                                                                    | 0.334590018   |             | 0.167300045 | 0.887520015  |             |            |  |
| S4                                                                    | 0.665409982   |             | 0.832699955 | 0.112479985  |             |            |  |
| S5                                                                    | 0.832699955   |             | 0.167289972 | 0.887520015  |             |            |  |
| S6                                                                    | 0.167300045   |             | 0.832710028 | 0.112479985  |             |            |  |
| S7                                                                    | 0.837019980   |             | 0.674040020 | 0.386209995  |             |            |  |
| S8                                                                    | 0.162980020   |             | 0.325959980 | 0.613790035  |             |            |  |
| S9                                                                    | 0.325959980   |             | 0.162979960 | 0.386209995  |             |            |  |
| S10                                                                   | 0.674040020   |             | 0.837020040 | 0.613790035  |             |            |  |
| S11                                                                   | 0.837020040   |             | 0.162980020 | 0.386209995  |             |            |  |
| S12                                                                   | 0.162979960   |             | 0.837019980 | 0.613790035  |             |            |  |
| S13                                                                   | 0.333333373   |             | 0.666666687 | 0.884909987  |             |            |  |
| S14                                                                   | 0.666666627   |             | 0.333333313 | 0.115090013  |             |            |  |
| S15                                                                   | 0.333333373   |             | 0.666666687 | 0.392439991  |             |            |  |
| S16                                                                   | 0.666666627   |             | 0.333333313 | 0.607560039  |             |            |  |
| Ti1                                                                   | 0.000000000   |             | 0.000000000 | 0.500000000  |             |            |  |
| $Cm$                                                                  | 7.49471       | 7.48775     | 12.17978    | 90.00340     | 90          | 120.03074  |  |
|                                                                       | Atom position |             |             |              |             |            |  |
| $\text{Li}_{1.875}(\text{Fe}_{0.875}\text{Ti}_{0.125})_{1/2}\text{S}$ | Fe1           | 0.006220    |             | 0.006531     | 0.000753    |            |  |
|                                                                       | Fe2           | 0.999644    |             | 0.499288     | 0.996220    |            |  |
|                                                                       | Fe3           | 0.500311    |             | 0.006531     | 0.000753    |            |  |
|                                                                       | Fe4           | 0.495261    |             | 0.490521     | 0.001115    |            |  |
|                                                                       | Fe5           | 0.938234    |             | 0.960219     | 0.503258    |            |  |



|           |               |          |          |          |          |           |
|-----------|---------------|----------|----------|----------|----------|-----------|
| Fe6       | 0.999025      | 0.498051 | 0.497200 |          |          |           |
| Fe7       | 0.521985      | 0.960219 | 0.503258 |          |          |           |
| Li1       | 0.823272      | 0.676340 | 0.816541 |          |          |           |
| Li2       | 0.817713      | 0.135426 | 0.808488 |          |          |           |
| Li3       | 0.666772      | 0.327516 | 0.680880 |          |          |           |
| Li4       | 0.353068      | 0.676340 | 0.816541 |          |          |           |
| Li5       | 0.173978      | 0.847956 | 0.673712 |          |          |           |
| Li6       | 0.336503      | 0.173008 | 0.815816 |          |          |           |
| Li7       | 0.160743      | 0.327516 | 0.680880 |          |          |           |
| Li8       | 0.845004      | 0.666962 | 0.312759 |          |          |           |
| Li9       | 0.666385      | 0.832767 | 0.170354 |          |          |           |
| Li10      | 0.838691      | 0.177383 | 0.321953 |          |          |           |
| Li11      | 0.665229      | 0.334926 | 0.185383 |          |          |           |
| Li12      | 0.321960      | 0.666962 | 0.312759 |          |          |           |
| Li13      | 0.167718      | 0.835436 | 0.182589 |          |          |           |
| Li14      | 0.331281      | 0.162562 | 0.327213 |          |          |           |
| Li15      | 0.169698      | 0.334926 | 0.185383 |          |          |           |
| S1        | 0.837595      | 0.664394 | 0.112354 |          |          |           |
| S2        | 0.665921      | 0.831841 | 0.905290 |          |          |           |
| S3        | 0.837191      | 0.174382 | 0.116607 |          |          |           |
| S4        | 0.671797      | 0.332512 | 0.884906 |          |          |           |
| S5        | 0.326800      | 0.664394 | 0.112354 |          |          |           |
| S6        | 0.167448      | 0.834896 | 0.883324 |          |          |           |
| S7        | 0.333502      | 0.167004 | 0.114647 |          |          |           |
| S8        | 0.160714      | 0.332512 | 0.884906 |          |          |           |
| S9        | 0.825891      | 0.667832 | 0.617553 |          |          |           |
| S10       | 0.662228      | 0.824455 | 0.373286 |          |          |           |
| S11       | 0.831237      | 0.162474 | 0.607702 |          |          |           |
| S12       | 0.666455      | 0.342169 | 0.390339 |          |          |           |
| S13       | 0.341943      | 0.667832 | 0.617553 |          |          |           |
| S14       | 0.166273      | 0.832544 | 0.396835 |          |          |           |
| S15       | 0.342485      | 0.184970 | 0.607964 |          |          |           |
| S16       | 0.175714      | 0.342169 | 0.390339 |          |          |           |
| Ti1       | 0.518415      | 0.536830 | 0.505578 |          |          |           |
| <i>Cm</i> | 6.64332       | 6.72032  | 12.56177 | 90       | 78.21938 | 120.38419 |
|           | Atom position |          |          |          |          |           |
|           | Fe1           | 0.933420 | 0.972605 | 0.009684 |          |           |
|           | Fe2           | 0.933420 | 0.460815 | 0.009684 |          |           |
|           | Fe3           | 0.478210 | 0.989105 | 0.002973 |          |           |
|           | Fe4           | 0.484065 | 0.492032 | 0.001250 |          |           |
|           | Fe5           | 0.999532 | 0.987758 | 0.497122 |          |           |
|           | Fe6           | 0.999532 | 0.511773 | 0.497122 |          |           |
|           | Fe7           | 0.550615 | 0.025307 | 0.494937 |          |           |
|           | Li1           | 0.103324 | 0.801661 | 0.734841 |          |           |
|           | Li2           | 0.102895 | 0.301447 | 0.729379 |          |           |
|           | Li3           | 0.017014 | 0.258507 | 0.244112 |          |           |
|           | Li4           | 0.466682 | 0.725909 | 0.256293 |          |           |
|           | Li5           | 0.012186 | 0.756092 | 0.244453 |          |           |
|           | Li6           | 0.466681 | 0.240771 | 0.256293 |          |           |
|           | S1            | 0.735724 | 0.617861 | 0.115573 |          |           |
|           | S2            | 0.681681 | 0.843651 | 0.898259 |          |           |
|           | S3            | 0.724080 | 0.112041 | 0.119190 |          |           |
|           | S4            | 0.681680 | 0.338029 | 0.898259 |          |           |

Li<sub>0.75</sub>(Fe<sub>0.875</sub>Ti<sub>0.125</sub>)<sub>1/2</sub>S

|                                                                       |               |          |          |          |    |           |
|-----------------------------------------------------------------------|---------------|----------|----------|----------|----|-----------|
|                                                                       | S5            | 0.244583 | 0.620014 | 0.102603 |    |           |
|                                                                       | S6            | 0.162257 | 0.831128 | 0.917398 |    |           |
|                                                                       | S7            | 0.244582 | 0.124567 | 0.102603 |    |           |
|                                                                       | S8            | 0.172243 | 0.336121 | 0.912581 |    |           |
|                                                                       | S9            | 0.807151 | 0.653575 | 0.619333 |    |           |
|                                                                       | S10           | 0.762204 | 0.890456 | 0.375879 |    |           |
|                                                                       | S11           | 0.815875 | 0.157938 | 0.598778 |    |           |
|                                                                       | S12           | 0.762203 | 0.371747 | 0.375879 |    |           |
|                                                                       | S13           | 0.298212 | 0.660719 | 0.594793 |    |           |
|                                                                       | S14           | 0.250610 | 0.875304 | 0.396509 |    |           |
|                                                                       | S15           | 0.298211 | 0.137492 | 0.594793 |    |           |
|                                                                       | S16           | 0.226145 | 0.363072 | 0.399310 |    |           |
|                                                                       | Ti1           | 0.572867 | 0.536434 | 0.494838 |    |           |
| <i>Cm</i>                                                             | 6.45880       | 6.31241  | 12.90679 | 90.33601 | 90 | 120.77020 |
|                                                                       | Atom position |          |          |          |    |           |
|                                                                       | Fe1           | 0.975268 | 0.952891 | 0.995568 |    |           |
|                                                                       | Fe2           | 0.023410 | 0.546820 | 0.996876 |    |           |
|                                                                       | Fe3           | 0.477623 | 0.952891 | 0.995568 |    |           |
|                                                                       | Fe4           | 0.522435 | 0.544871 | 0.998691 |    |           |
|                                                                       | Fe5           | 0.987341 | 0.015468 | 0.509253 |    |           |
|                                                                       | Fe6           | 0.986926 | 0.473853 | 0.507206 |    |           |
|                                                                       | Fe7           | 0.528127 | 0.015468 | 0.509253 |    |           |
|                                                                       | Li1           | 0.313123 | 0.126245 | 0.269154 |    |           |
|                                                                       | S1            | 0.833707 | 0.664660 | 0.109255 |    |           |
|                                                                       | S2            | 0.666913 | 0.833825 | 0.884570 |    |           |
|                                                                       | S3            | 0.833496 | 0.166992 | 0.081029 |    |           |
|                                                                       | S4            | 0.667709 | 0.335125 | 0.910557 |    |           |
| $\text{Li}_{0.125}(\text{Fe}_{0.875}\text{Ti}_{0.125})_{1/2}\text{S}$ | S5            | 0.330954 | 0.664660 | 0.109255 |    |           |
|                                                                       | S6            | 0.168634 | 0.837266 | 0.883998 |    |           |
|                                                                       | S7            | 0.332286 | 0.164572 | 0.081639 |    |           |
|                                                                       | S8            | 0.167415 | 0.335125 | 0.910557 |    |           |
|                                                                       | S9            | 0.850868 | 0.674518 | 0.612766 |    |           |
|                                                                       | S10           | 0.677411 | 0.854820 | 0.393412 |    |           |
|                                                                       | S11           | 0.834969 | 0.169940 | 0.621511 |    |           |
|                                                                       | S12           | 0.674662 | 0.327274 | 0.392700 |    |           |
|                                                                       | S13           | 0.323652 | 0.674518 | 0.612766 |    |           |
|                                                                       | S14           | 0.170058 | 0.840115 | 0.418967 |    |           |
|                                                                       | S15           | 0.327251 | 0.154503 | 0.612994 |    |           |
|                                                                       | S16           | 0.152612 | 0.327274 | 0.392700 |    |           |
|                                                                       | Ti1           | 0.503453 | 0.506906 | 0.505098 |    |           |

**Table S5.** Lattice parameters and atomic position for  $\text{Li}_{1-x}(\text{Fe}_{0.875}\text{V}_{0.125})_{1/2}\text{S}$ 

| Space group                                                         | <i>a</i>      | <i>b</i>    | <i>c</i>    | $\alpha$    | $\beta$     | $\gamma$    |
|---------------------------------------------------------------------|---------------|-------------|-------------|-------------|-------------|-------------|
| $P\bar{3}m1$                                                        | 7.5258        | 7.5258      | 12.0294     | 90          | 90          | 120         |
|                                                                     | Atom position |             |             |             |             |             |
| $\text{Li}_2\text{Fe}_{0.875}\text{V}_{0.125}\text{S}_2$            | Fe1           | 0.500000000 | 0.500000000 | 0.000000000 | 0.000000000 | 0.000000000 |
|                                                                     | Fe2           | 0.500000000 | 0.000000000 | 0.000000000 | 0.000000000 | 0.000000000 |
|                                                                     | Fe3           | 0.000000000 | 0.500000000 | 0.500000000 | 0.000000000 | 0.000000000 |
|                                                                     | Fe4           | 0.500000000 | 0.500000000 | 0.500000000 | 0.500000000 | 0.500000000 |
|                                                                     | Fe5           | 0.500000000 | 0.000000000 | 0.000000000 | 0.500000000 | 0.500000000 |
|                                                                     | Fe6           | 0.000000000 | 0.500000000 | 0.500000000 | 0.500000000 | 0.500000000 |
|                                                                     | Fe7           | 0.000000000 | 0.000000000 | 0.000000000 | 0.500000000 | 0.500000000 |
|                                                                     | Li1           | 0.831239998 | 0.662479997 | 0.662479997 | 0.184000000 | 0.184000000 |
|                                                                     | Li2           | 0.168760002 | 0.337520003 | 0.337520003 | 0.815999985 | 0.815999985 |
|                                                                     | Li3           | 0.337520003 | 0.168760002 | 0.168760002 | 0.184000000 | 0.184000000 |
|                                                                     | Li4           | 0.662479997 | 0.831239998 | 0.831239998 | 0.815999985 | 0.815999985 |
|                                                                     | Li5           | 0.831239998 | 0.168760002 | 0.168760002 | 0.184000000 | 0.184000000 |
|                                                                     | Li6           | 0.168760002 | 0.831239998 | 0.831239998 | 0.815999985 | 0.815999985 |
|                                                                     | Li7           | 0.668760002 | 0.834380031 | 0.834380031 | 0.320719987 | 0.320719987 |
|                                                                     | Li8           | 0.331239998 | 0.165619999 | 0.165619999 | 0.679280043 | 0.679280043 |
|                                                                     | Li9           | 0.165619999 | 0.834380031 | 0.834380031 | 0.320719987 | 0.320719987 |
|                                                                     | Li10          | 0.834380031 | 0.165619999 | 0.165619999 | 0.679280043 | 0.679280043 |
| Li11                                                                | 0.165619999   | 0.331239998 | 0.331239998 | 0.320719987 | 0.320719987 |             |
| Li12                                                                | 0.834380031   | 0.668760002 | 0.668760002 | 0.679280043 | 0.679280043 |             |
| Li13                                                                | 0.333333373   | 0.666666687 | 0.666666687 | 0.175760001 | 0.175760001 |             |
| Li14                                                                | 0.666666627   | 0.333333313 | 0.333333313 | 0.824239969 | 0.824239969 |             |
| Li15                                                                | 0.666666687   | 0.333333343 | 0.333333343 | 0.320239991 | 0.320239991 |             |
| Li16                                                                | 0.333333313   | 0.666666627 | 0.666666627 | 0.679759979 | 0.679759979 |             |
| S1                                                                  | 0.838419974   | 0.676840007 | 0.676840007 | 0.888870001 | 0.888870001 |             |
| S2                                                                  | 0.161580026   | 0.323159993 | 0.323159993 | 0.111129999 | 0.111129999 |             |
| S3                                                                  | 0.323159993   | 0.161579967 | 0.161579967 | 0.888870001 | 0.888870001 |             |
| S4                                                                  | 0.676840007   | 0.838420033 | 0.838420033 | 0.111129999 | 0.111129999 |             |
| S5                                                                  | 0.838420033   | 0.161580026 | 0.161580026 | 0.888870001 | 0.888870001 |             |
| S6                                                                  | 0.161579967   | 0.838419974 | 0.838419974 | 0.111129999 | 0.111129999 |             |
| S7                                                                  | 0.832669973   | 0.665349960 | 0.665349960 | 0.387620002 | 0.387620002 |             |
| S8                                                                  | 0.167330027   | 0.334650010 | 0.334650010 | 0.612380028 | 0.612380028 |             |
| S9                                                                  | 0.334650010   | 0.167319983 | 0.167319983 | 0.387620002 | 0.387620002 |             |
| S10                                                                 | 0.665349960   | 0.832679987 | 0.832679987 | 0.612380028 | 0.612380028 |             |
| S11                                                                 | 0.832679987   | 0.167330027 | 0.167330027 | 0.387620002 | 0.387620002 |             |
| S12                                                                 | 0.167319983   | 0.832669973 | 0.832669973 | 0.612380028 | 0.612380028 |             |
| S13                                                                 | 0.333333373   | 0.666666687 | 0.666666687 | 0.891240001 | 0.891240001 |             |
| S14                                                                 | 0.666666627   | 0.333333313 | 0.333333313 | 0.108759999 | 0.108759999 |             |
| S15                                                                 | 0.333333373   | 0.666666687 | 0.666666687 | 0.383459985 | 0.383459985 |             |
| S16                                                                 | 0.666666627   | 0.333333313 | 0.333333313 | 0.616540015 | 0.616540015 |             |
| Ti1                                                                 | 0.000000000   | 0.000000000 | 0.000000000 | 0.000000000 | 0.000000000 |             |
| $C2$                                                                | 6.70890       | 6.59793     | 11.77052    | 90.55140    | 90          | 120.55796   |
|                                                                     | Atom position |             |             |             |             |             |
| $\text{Li}_{0.75}(\text{Fe}_{0.875}\text{V}_{0.125})_{1/2}\text{S}$ | Fe1           | 0.013527    | 1.000000    | 0.000000    | 0.000000    | 0.000000    |
|                                                                     | Fe2           | 0.477290    | 0.463676    | 0.006250    | 0.006250    | 0.006250    |
|                                                                     | Fe3           | 0.013615    | 0.536324    | 0.993750    | 0.993750    | 0.993750    |
|                                                                     | Fe4           | 0.995452    | 0.000000    | 0.500000    | 0.500000    | 0.500000    |
|                                                                     | Fe5           | 0.468747    | 0.478895    | 0.501288    | 0.501288    | 0.501288    |
|                                                                     | Fe6           | 0.989852    | 0.521105    | 0.498712    | 0.498712    | 0.498712    |

|    |     |               |          |          |          |    |           |
|----|-----|---------------|----------|----------|----------|----|-----------|
|    | Fe7 | 0.463237      | 0.000000 | 0.500000 |          |    |           |
|    | Li1 | 0.503136      | 0.004249 | 0.747193 |          |    |           |
|    | Li2 | 0.961172      | 0.005961 | 0.748951 |          |    |           |
|    | Li3 | 0.498424      | 0.507848 | 0.755684 |          |    |           |
|    | Li4 | 0.498886      | 0.995752 | 0.252807 |          |    |           |
|    | Li5 | 0.990576      | 0.492152 | 0.244316 |          |    |           |
|    | Li6 | 0.955212      | 0.994039 | 0.251049 |          |    |           |
|    | S1  | 0.308904      | 0.165561 | 0.127959 |          |    |           |
|    | S2  | 0.143344      | 0.834440 | 0.872041 |          |    |           |
|    | S3  | 0.818444      | 0.662501 | 0.100870 |          |    |           |
|    | S4  | 0.667977      | 0.339879 | 0.892548 |          |    |           |
|    | S5  | 0.328098      | 0.660122 | 0.107452 |          |    |           |
|    | S6  | 0.155943      | 0.337499 | 0.899130 |          |    |           |
|    | S7  | 0.829712      | 0.177810 | 0.094701 |          |    |           |
|    | S8  | 0.651902      | 0.822190 | 0.905299 |          |    |           |
|    | S9  | 0.310586      | 0.162655 | 0.616901 |          |    |           |
|    | S10 | 0.147932      | 0.837346 | 0.383099 |          |    |           |
|    | S11 | 0.805751      | 0.663925 | 0.602158 |          |    |           |
|    | S12 | 0.653328      | 0.337056 | 0.396357 |          |    |           |
|    | S13 | 0.316272      | 0.662945 | 0.603643 |          |    |           |
|    | S14 | 0.141826      | 0.336075 | 0.397842 |          |    |           |
|    | S15 | 0.815900      | 0.173118 | 0.594296 |          |    |           |
|    | S16 | 0.642782      | 0.826882 | 0.405704 |          |    |           |
|    | V1  | 0.435289      | 0.000000 | 0.000000 |          |    |           |
|    |     | 6.60466       | 6.42753  | 12.22412 | 90.36223 | 90 | 120.91589 |
| C2 |     | Atom position |          |          |          |    |           |
|    | Fe1 | 0.018225      | 1.000000 | 0.000000 |          |    |           |
|    | Fe2 | 0.468200      | 0.451352 | 0.007567 |          |    |           |
|    | Fe3 | 0.016848      | 0.548648 | 0.992433 |          |    |           |
|    | Fe4 | 0.035706      | 1.000000 | 0.500000 |          |    |           |
|    | Fe5 | 0.485387      | 0.456577 | 0.505667 |          |    |           |
|    | Fe6 | 0.028810      | 0.543423 | 0.494333 |          |    |           |
|    | Fe7 | 0.489539      | 0.000000 | 0.500000 |          |    |           |
|    | Li1 | 0.990685      | 0.483494 | 0.743413 |          |    |           |
|    | Li2 | 0.519300      | 0.526618 | 0.758429 |          |    |           |
|    | Li3 | 0.992682      | 0.473382 | 0.241571 |          |    |           |
|    | Li4 | 0.507191      | 0.516506 | 0.256587 |          |    |           |
|    | S1  | 0.307986      | 0.148640 | 0.128285 |          |    |           |
|    | S2  | 0.159347      | 0.851361 | 0.871715 |          |    |           |
|    | S3  | 0.815669      | 0.659189 | 0.100574 |          |    |           |
|    | S4  | 0.670252      | 0.342891 | 0.893170 |          |    |           |
|    | S5  | 0.327362      | 0.657110 | 0.106830 |          |    |           |
|    | S6  | 0.156480      | 0.340811 | 0.899426 |          |    |           |
|    | S7  | 0.836514      | 0.182837 | 0.088357 |          |    |           |
|    | S8  | 0.653676      | 0.817163 | 0.911643 |          |    |           |
|    | S9  | 0.338018      | 0.149339 | 0.619331 |          |    |           |
|    | S10 | 0.188679      | 0.850662 | 0.380669 |          |    |           |
|    | S11 | 0.831029      | 0.661247 | 0.601051 |          |    |           |
|    | S12 | 0.683287      | 0.338278 | 0.395804 |          |    |           |
|    | S13 | 0.345009      | 0.661723 | 0.604196 |          |    |           |
|    | S14 | 0.169782      | 0.338753 | 0.398949 |          |    |           |
|    | S15 | 0.851194      | 0.178745 | 0.588058 |          |    |           |
|    | S16 | 0.672449      | 0.821255 | 0.411942 |          |    |           |

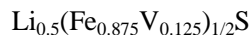

|                                                                               |          | V1            | 0.443810 | 0.000000 | 1.000000              |
|-------------------------------------------------------------------------------|----------|---------------|----------|----------|-----------------------|
| C2                                                                            |          | 6.49310       | 6.28227  | 13.03767 | 89.03111 90 121.11646 |
|                                                                               |          | Atom position |          |          |                       |
| Li <sub>0.25</sub> (Fe <sub>0.875</sub> V <sub>0.125</sub> ) <sub>1/2</sub> S | Fe1      | 0.031964      | 1.000000 | 0.000000 |                       |
|                                                                               | Fe2      | 0.464327      | 0.438343 | 0.008413 |                       |
|                                                                               | Fe3      | 0.025984      | 0.561657 | 0.991587 |                       |
|                                                                               | Fe4      | 0.031452      | 1.000000 | 0.500000 |                       |
|                                                                               | Fe5      | 0.474333      | 0.445079 | 0.502826 |                       |
|                                                                               | Fe6      | 0.029254      | 0.554921 | 0.497174 |                       |
|                                                                               | Fe7      | 0.472053      | 0.000000 | 0.500000 |                       |
|                                                                               | Li1      | 0.697432      | 0.859633 | 0.734688 |                       |
|                                                                               | Li2      | 0.837799      | 0.140367 | 0.265312 |                       |
|                                                                               | S1       | 0.311177      | 0.140185 | 0.124265 |                       |
|                                                                               | S2       | 0.170992      | 0.859816 | 0.875735 |                       |
|                                                                               | S3       | 0.813727      | 0.649949 | 0.094979 |                       |
|                                                                               | S4       | 0.677148      | 0.352051 | 0.896957 |                       |
|                                                                               | S5       | 0.325097      | 0.647950 | 0.103044 |                       |
|                                                                               | S6       | 0.163778      | 0.350051 | 0.905021 |                       |
|                                                                               | S7       | 0.843402      | 0.181553 | 0.083070 |                       |
|                                                                               | S8       | 0.661849      | 0.818447 | 0.916930 |                       |
| S9                                                                            | 0.323680 | 0.143879      | 0.615007 |          |                       |
| S10                                                                           | 0.179802 | 0.856122      | 0.384993 |          |                       |
| S11                                                                           | 0.814872 | 0.652833      | 0.597355 |          |                       |
| S12                                                                           | 0.688232 | 0.346212      | 0.401902 |          |                       |
| S13                                                                           | 0.342019 | 0.653789      | 0.598098 |          |                       |
| S14                                                                           | 0.162039 | 0.347167      | 0.402645 |          |                       |
| S15                                                                           | 0.837294 | 0.171505      | 0.584562 |          |                       |
| S16                                                                           | 0.665789 | 0.828495      | 0.415438 |          |                       |
| V1                                                                            | 0.451188 | 0.000000      | 1.000000 |          |                       |

**Figure S4.** Partial density of states for  $\text{Li}_2\text{Fe}_{0.875}\text{Ti}_{0.125}\text{S}_2$  (a),  $\text{Li}_{1.875}\text{Fe}_{0.875}\text{Ti}_{0.125}\text{S}_2$  (b),  $\text{Li}_{0.75}\text{Fe}_{0.875}\text{Ti}_{0.125}\text{S}_2$  (c),  $\text{Li}_{0.125}\text{Fe}_{0.875}\text{Ti}_{0.125}\text{S}_2$  (d) and  $\text{Fe}_{0.875}\text{Ti}_{0.125}\text{S}_2$  (e); charge distribution of Fe and Ti atoms (f).

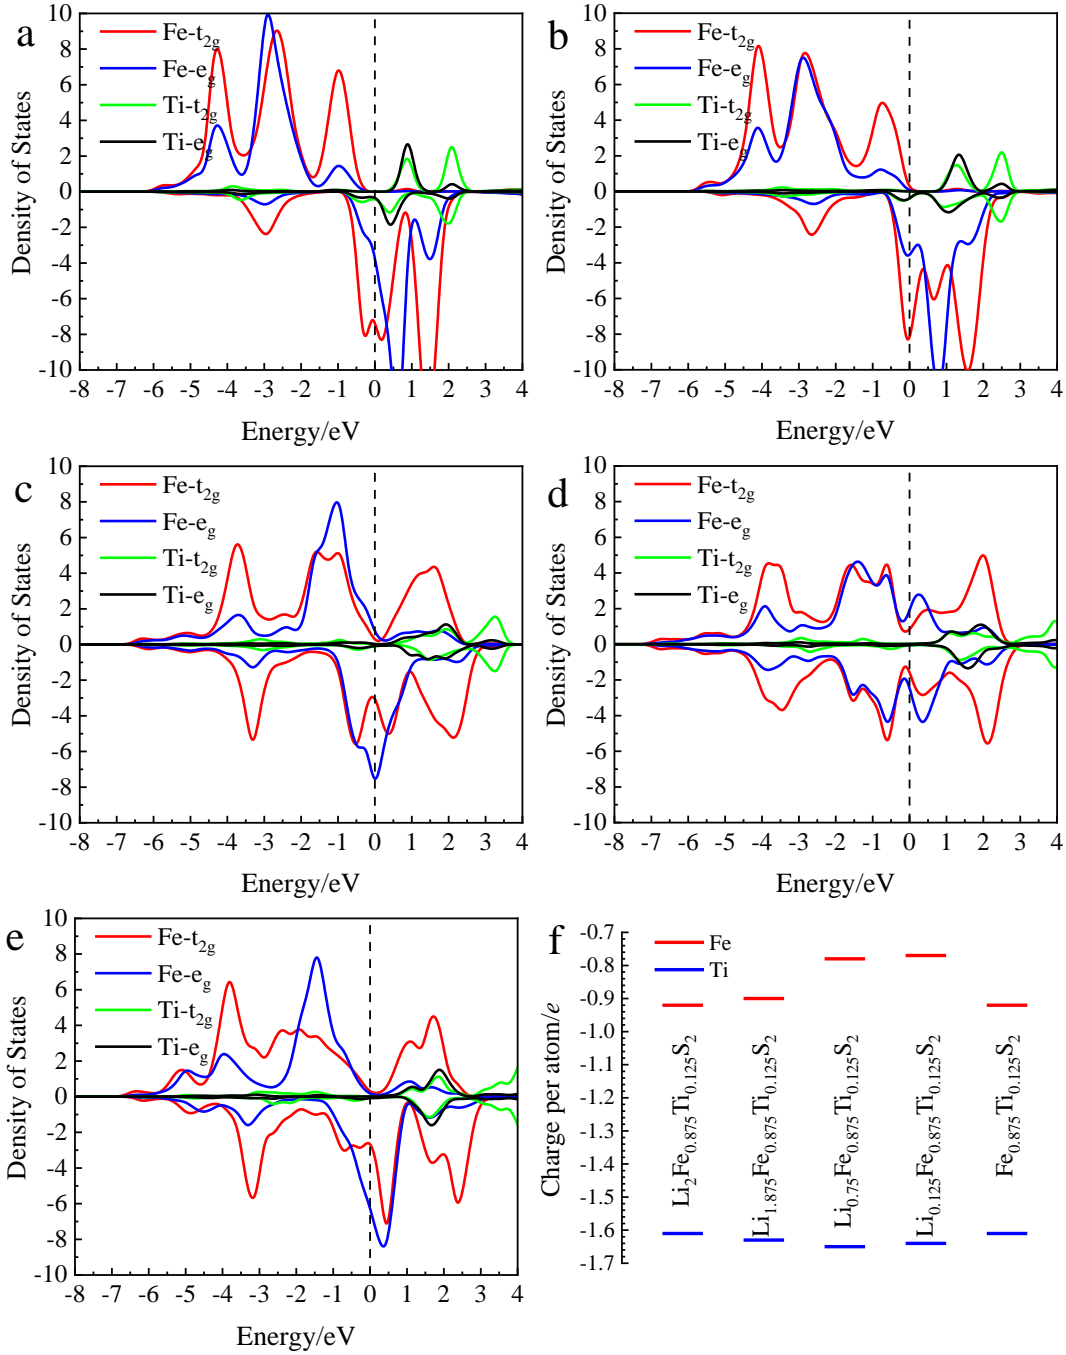

**Figure S5.** Partial density of states for  $\text{Li}_2\text{Fe}_{0.875}\text{V}_{0.125}\text{S}_2$  (a),  $\text{Li}_{0.75}\text{Fe}_{0.875}\text{V}_{0.125}\text{S}_2$  (b),  $\text{Li}_{0.5}\text{Fe}_{0.875}\text{V}_{0.125}\text{S}_2$  (c),  $\text{Li}_{0.25}\text{Fe}_{0.875}\text{V}_{0.125}\text{S}_2$  (d), and  $\text{Fe}_{0.875}\text{V}_{0.125}\text{S}_2$  (e); charge distribution of Fe and V atoms (f).

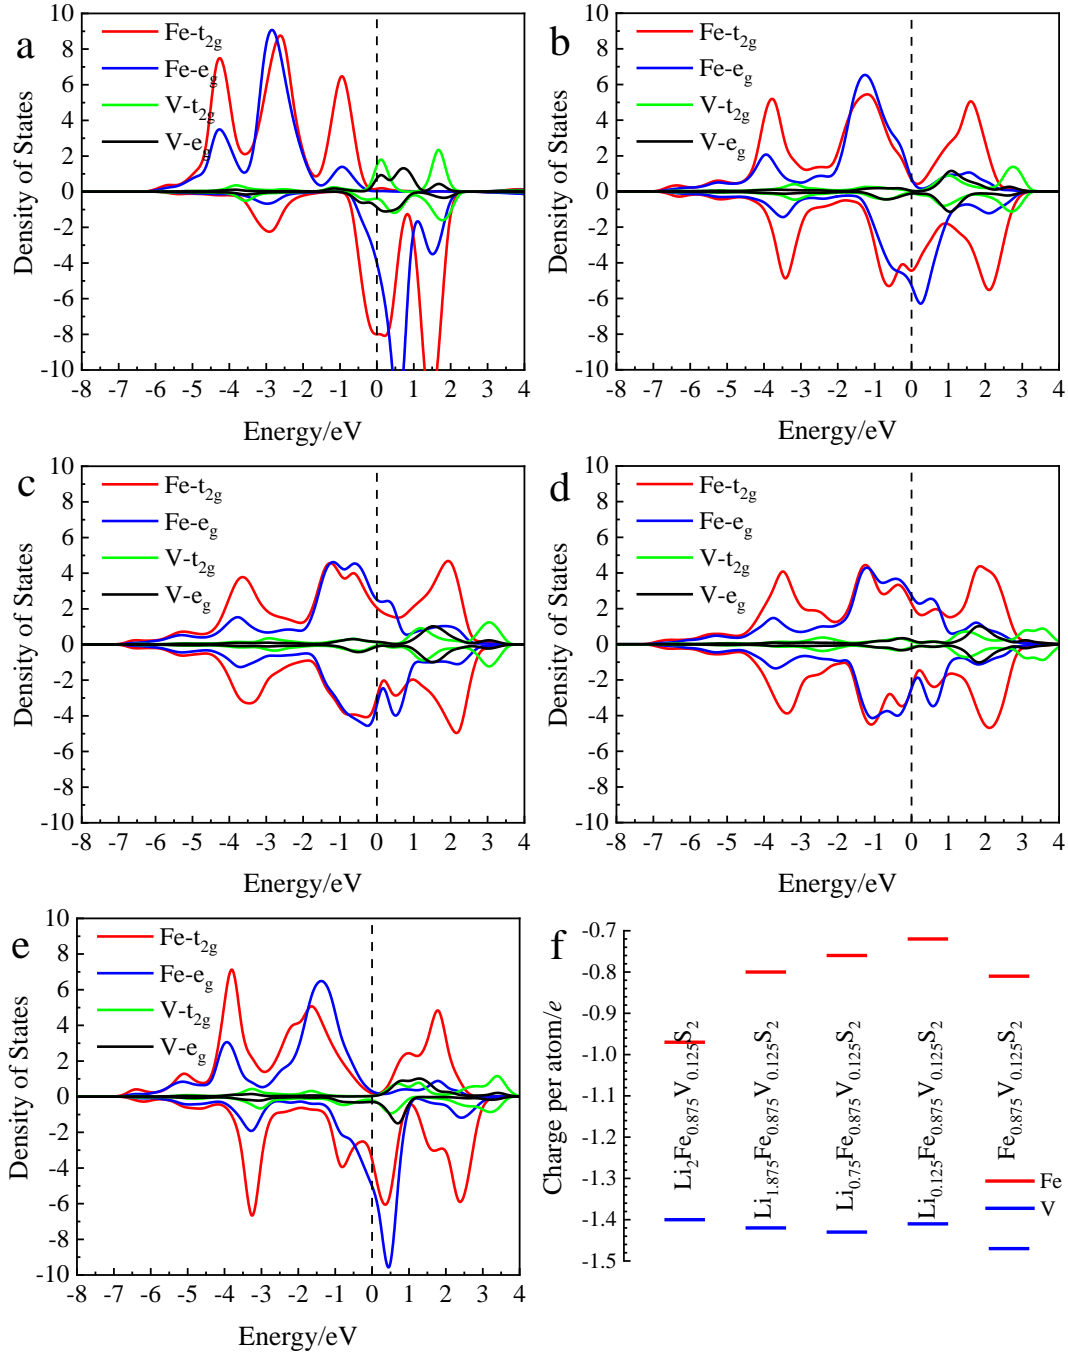

**Figure S6.** Li diffusion paths in  $\text{Li}_2\text{Fe}_{0.875}\text{Ti}_{0.125}\text{S}_2$  (a) and  $\text{Li}_2\text{Fe}_{0.875}\text{V}_{0.125}\text{S}_2$  (b) bulks (1-6 is for Li1-Li6.)

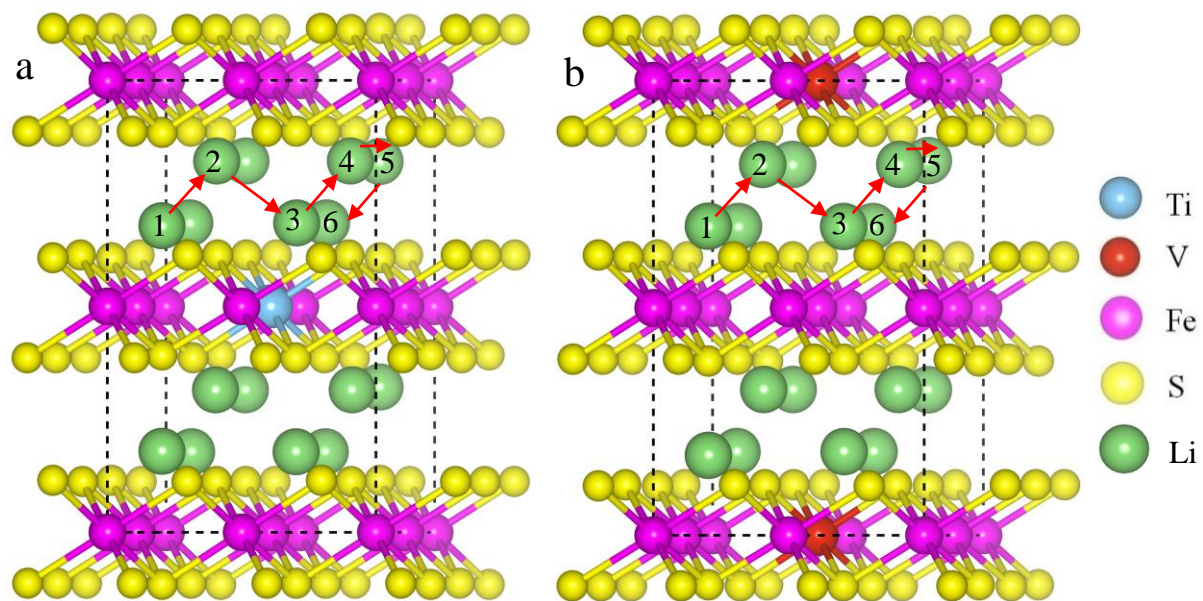



**Figure S7.** The structures for  $\text{Li}_2\text{FeS}_2(100)$  (a),  $\text{Li}_2\text{FeS}_2(110)$  (b),  $\text{Li}_2\text{FeS}_2(001)$  (c),  $\text{Li}_2\text{FeS}_2(002)$  (d),  $\text{Li}_2\text{Fe}_{0.875}\text{Ti}_{0.125}\text{S}_2(002)$  (e) and  $\text{Li}_2\text{Fe}_{0.875}\text{V}_{0.125}\text{S}_2(002)$  (f)

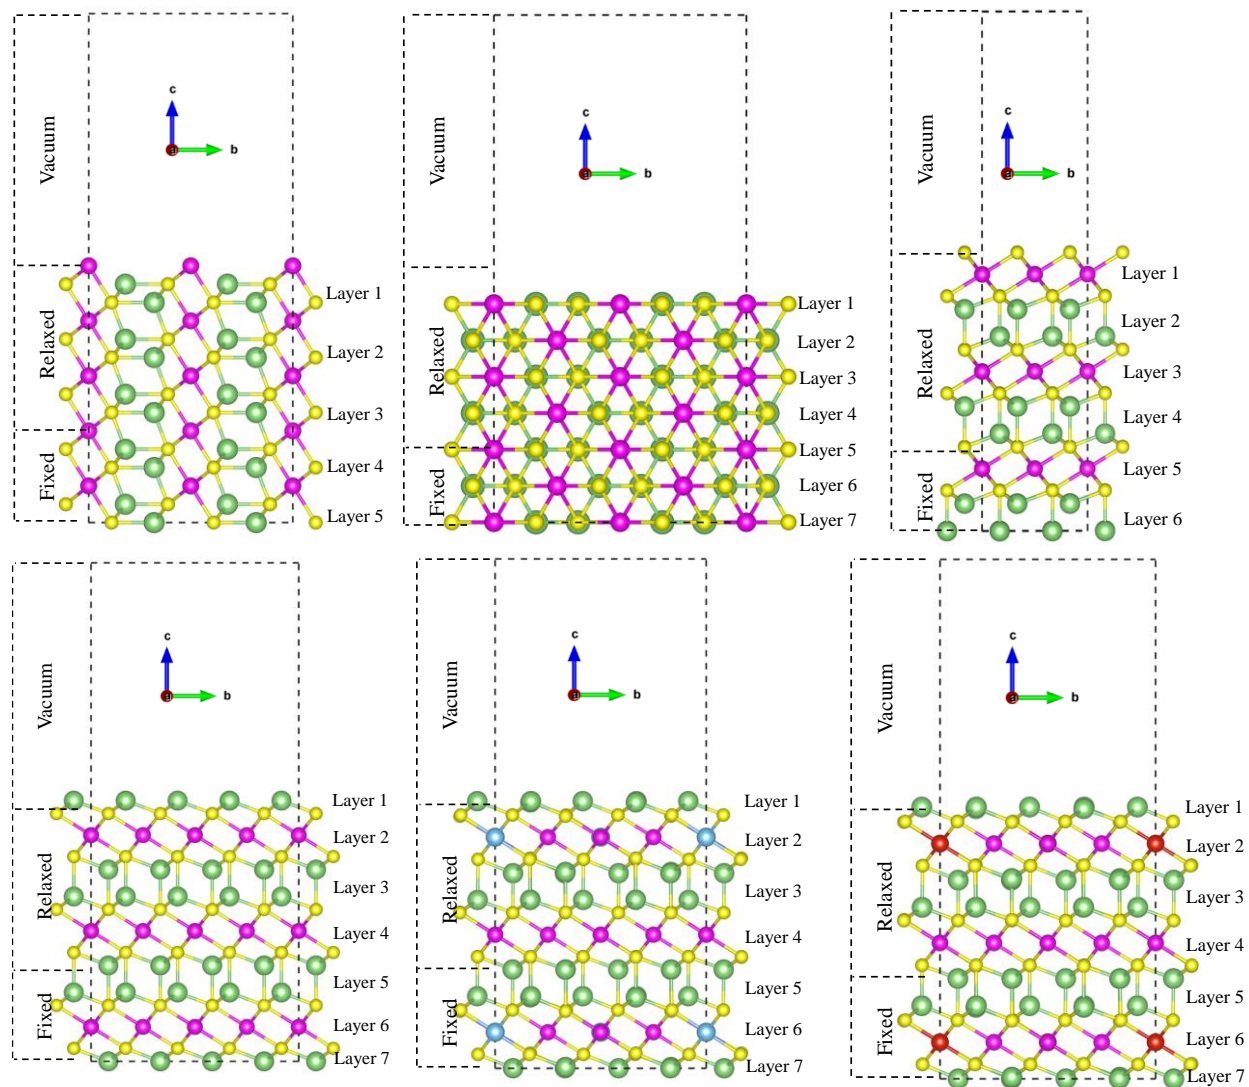

**Figure S8.** The structures for  $\text{Li}_2\text{S}_2\text{-Li}_2\text{FeS}_2(002)$  (a),  $\text{Li}_3\text{S}_2\text{-Li}_2\text{FeS}_2(002)$  (b),  $\text{LiS-Li}_2\text{FeS}_2(002)$  (c) and  $\text{Li}_2\text{S-Li}_2\text{FeS}_2(002)$  (d)

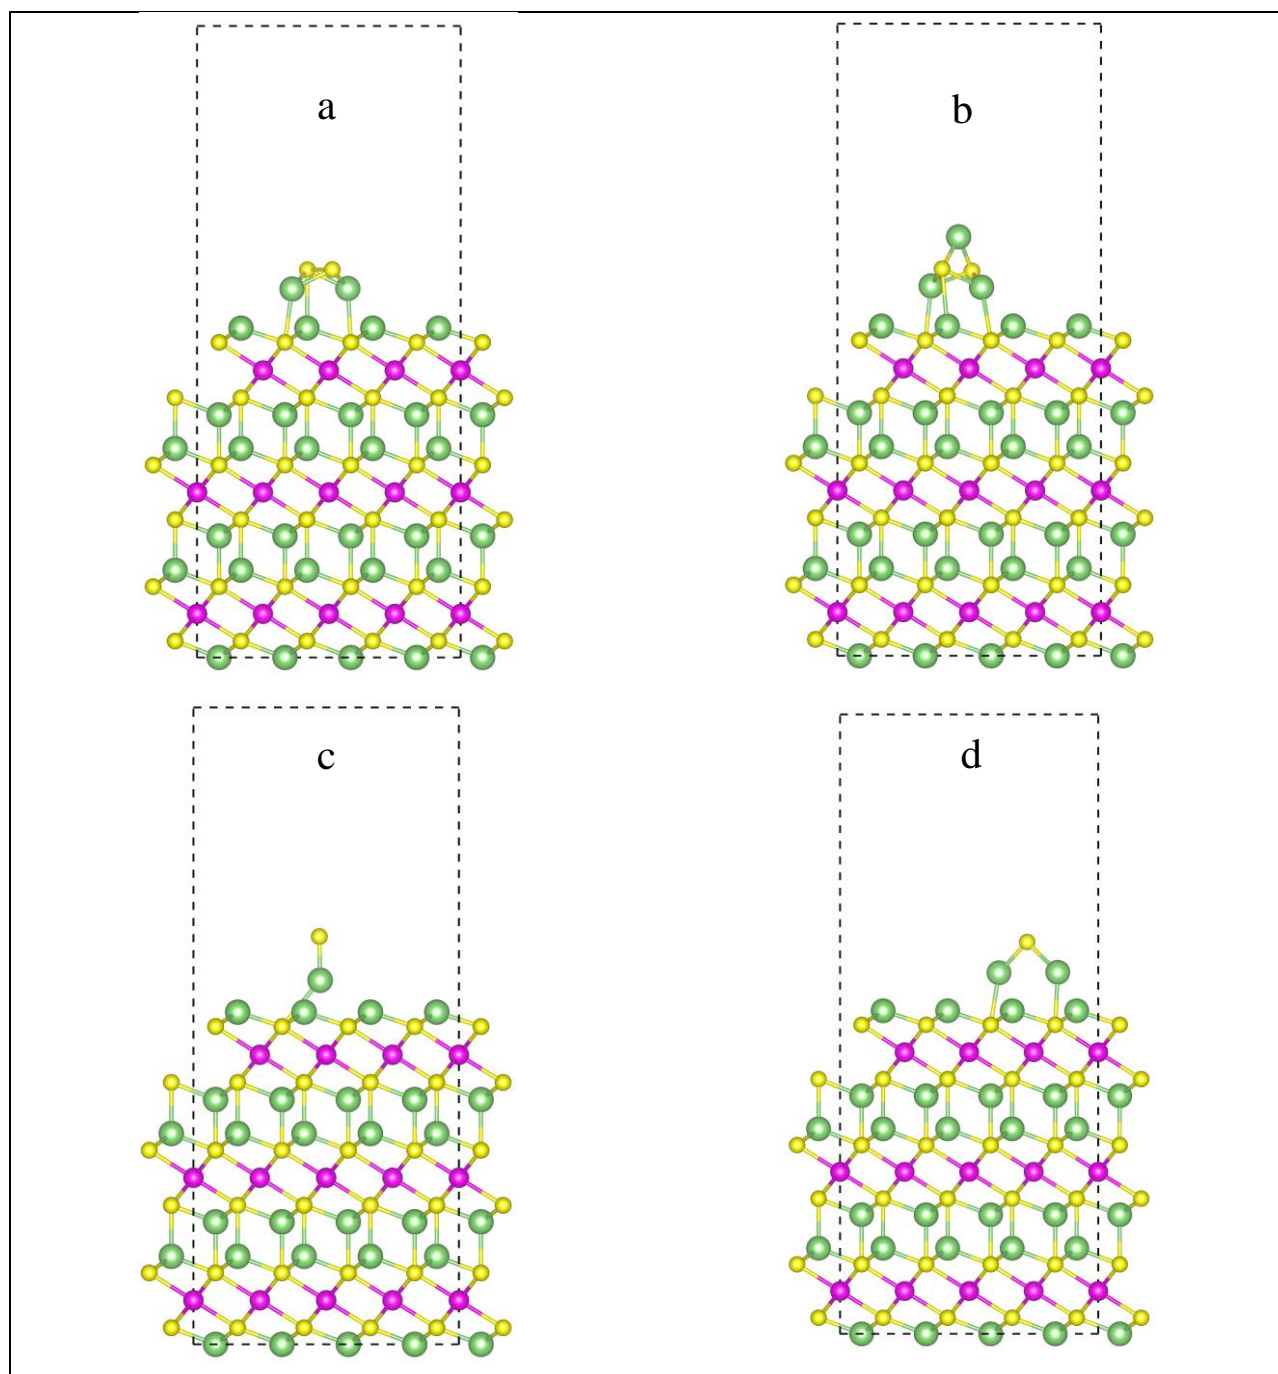

**Figure S9.** The structures for  $\text{Li}_2\text{S}_2\text{-Li}_2\text{Fe}_{0.875}\text{Ti}_{0.125}\text{S}_2(002)$  (a),  $\text{Li}_3\text{S}_2\text{-Li}_2\text{Fe}_{0.875}\text{Ti}_{0.125}\text{S}_2(002)$  (b),  $\text{LiS-Li}_2\text{Fe}_{0.875}\text{Ti}_{0.125}\text{S}_2(002)$  (c) and  $\text{Li}_2\text{S-Li}_2\text{Fe}_{0.875}\text{Ti}_{0.125}\text{S}_2(002)$  (d)

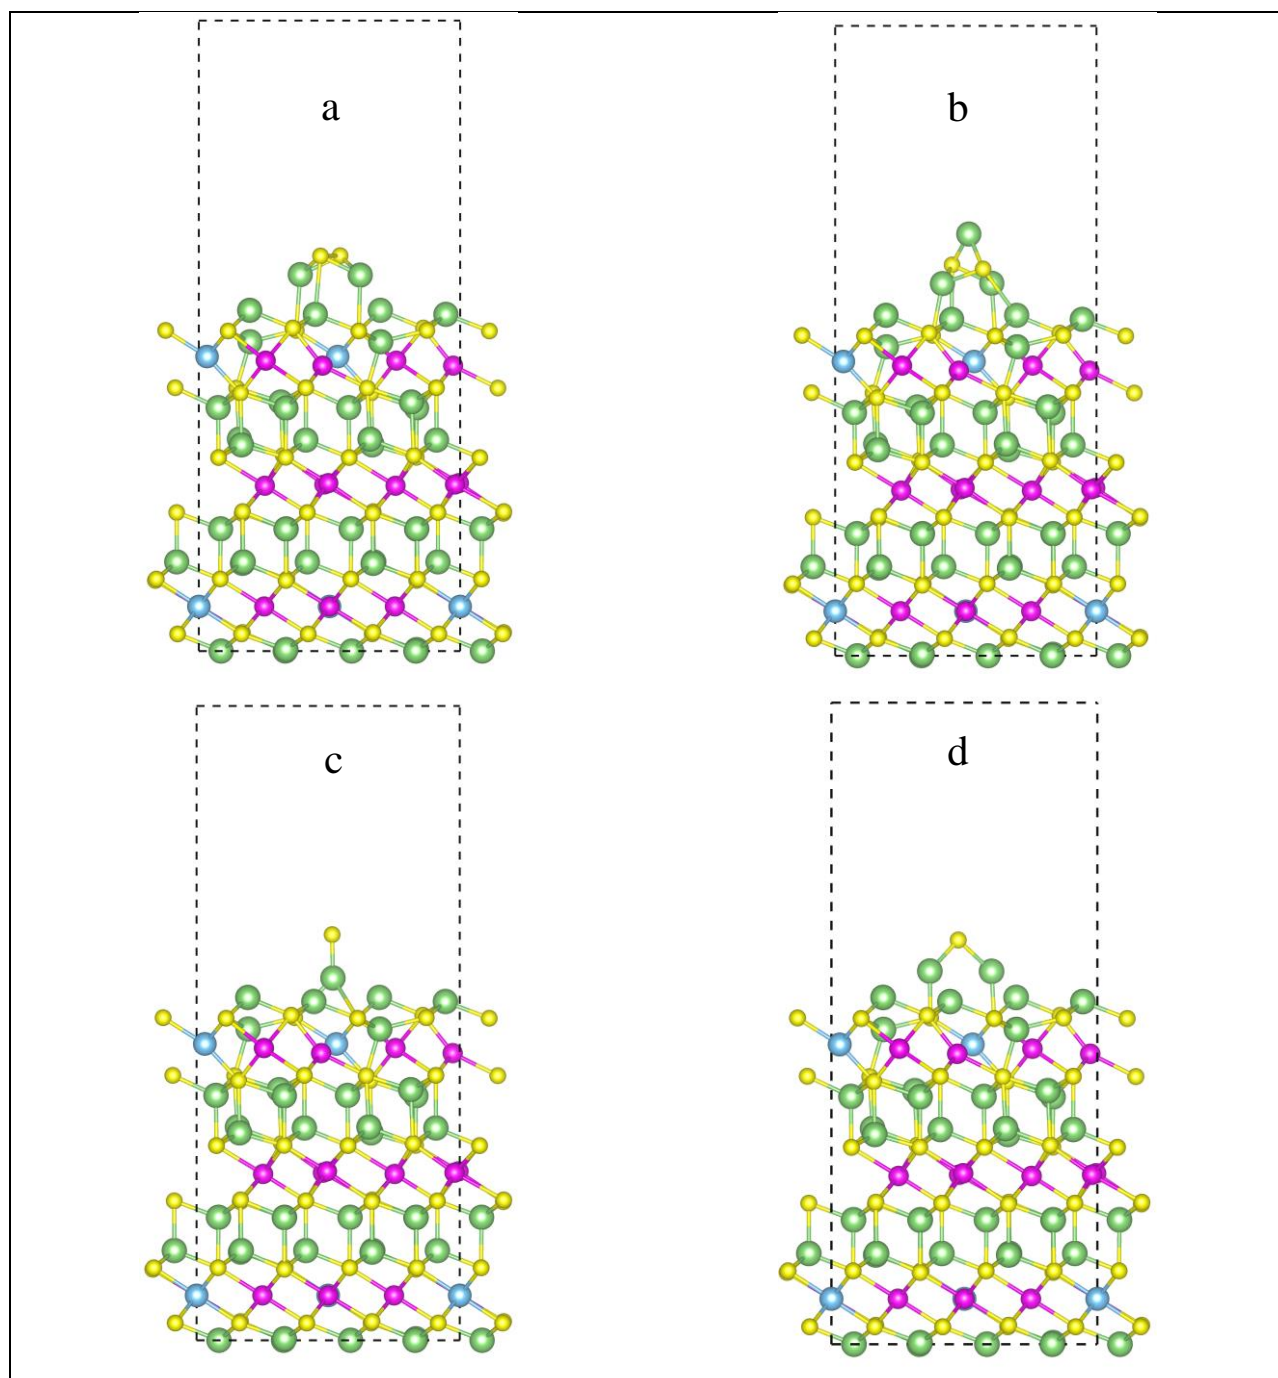

**Figure S10.** The structures for  $\text{Li}_2\text{S}_2\text{-Li}_2\text{Fe}_{0.875}\text{V}_{0.125}\text{S}_2(002)$  (a),  $\text{Li}_3\text{S}_2\text{-Li}_2\text{Fe}_{0.875}\text{V}_{0.125}\text{S}_2(002)$  (b),  $\text{LiS-Li}_2\text{Fe}_{0.875}\text{V}_{0.125}\text{S}_2(002)$  (c) and  $\text{Li}_2\text{S-Li}_2\text{Fe}_{0.875}\text{V}_{0.125}\text{S}_2(002)$  (d)

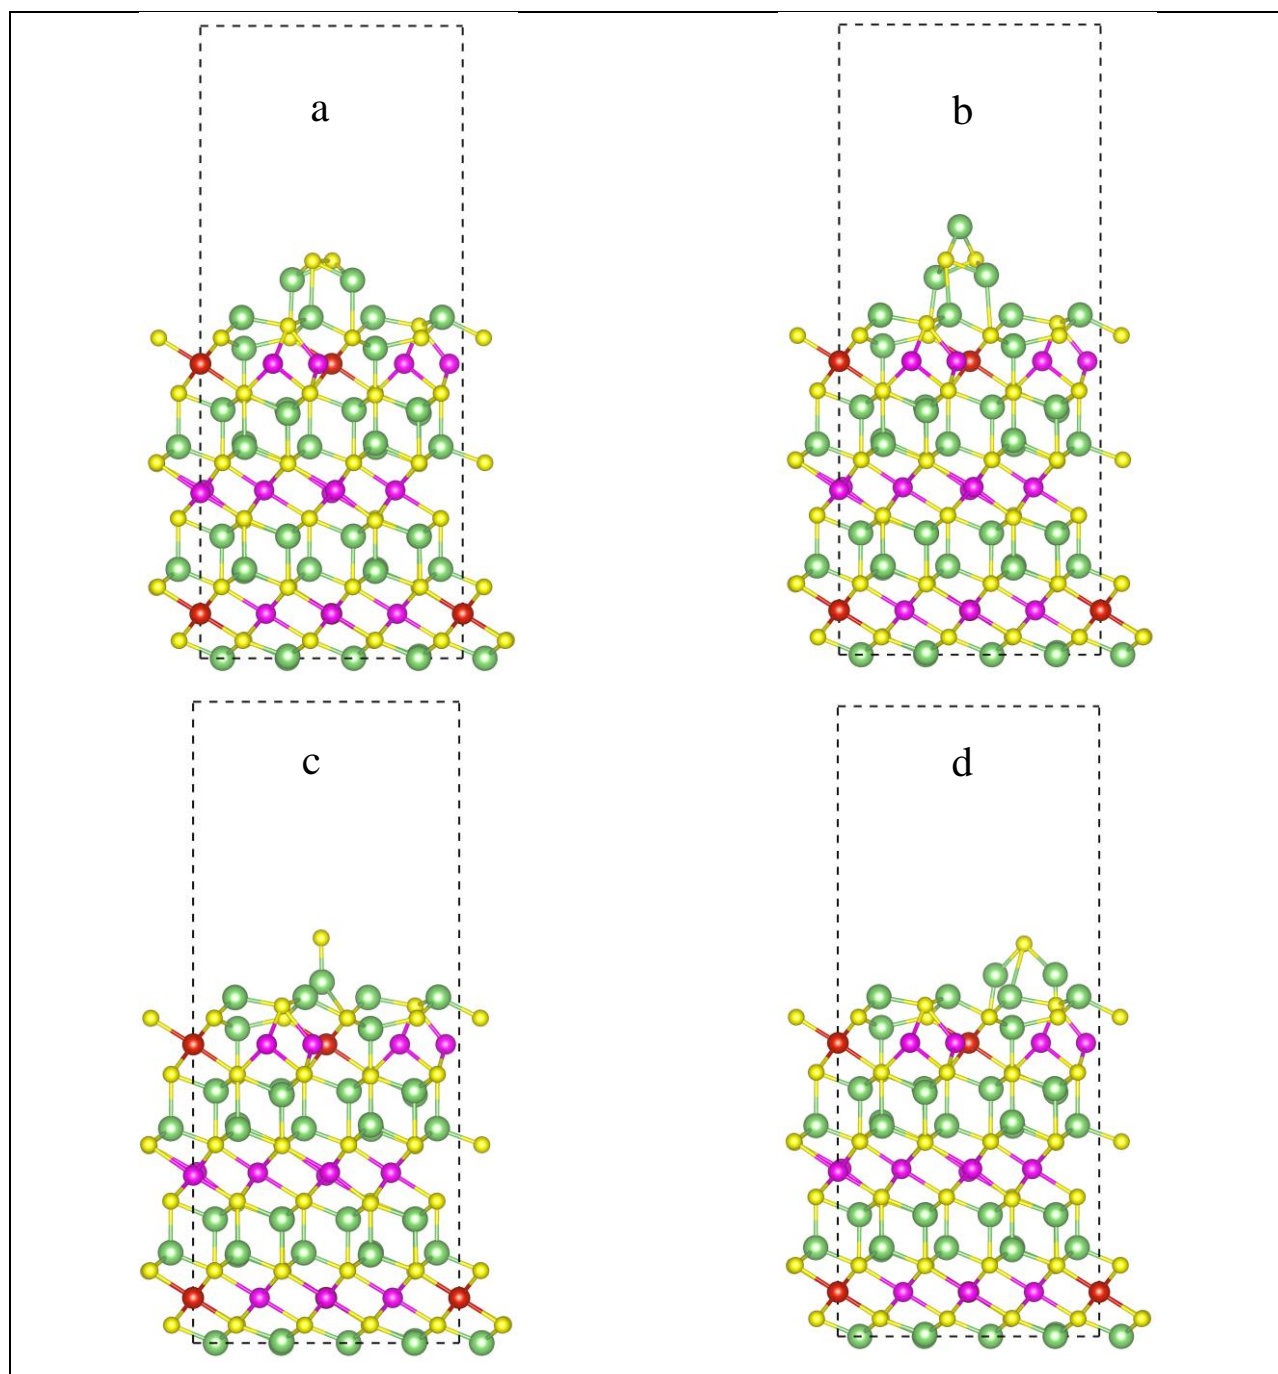



**Figure S11.**  $\text{Li}_2\text{S}$  decomposition paths on  $\text{Li}_2\text{FeS}_2(002)$  (a),  $\text{Li}_2\text{Fe}_{0.875}\text{Ti}_{0.125}\text{S}_2(002)$  (b) and  $\text{Li}_2\text{Fe}_{0.875}\text{V}_{0.125}\text{S}_2(002)$ .

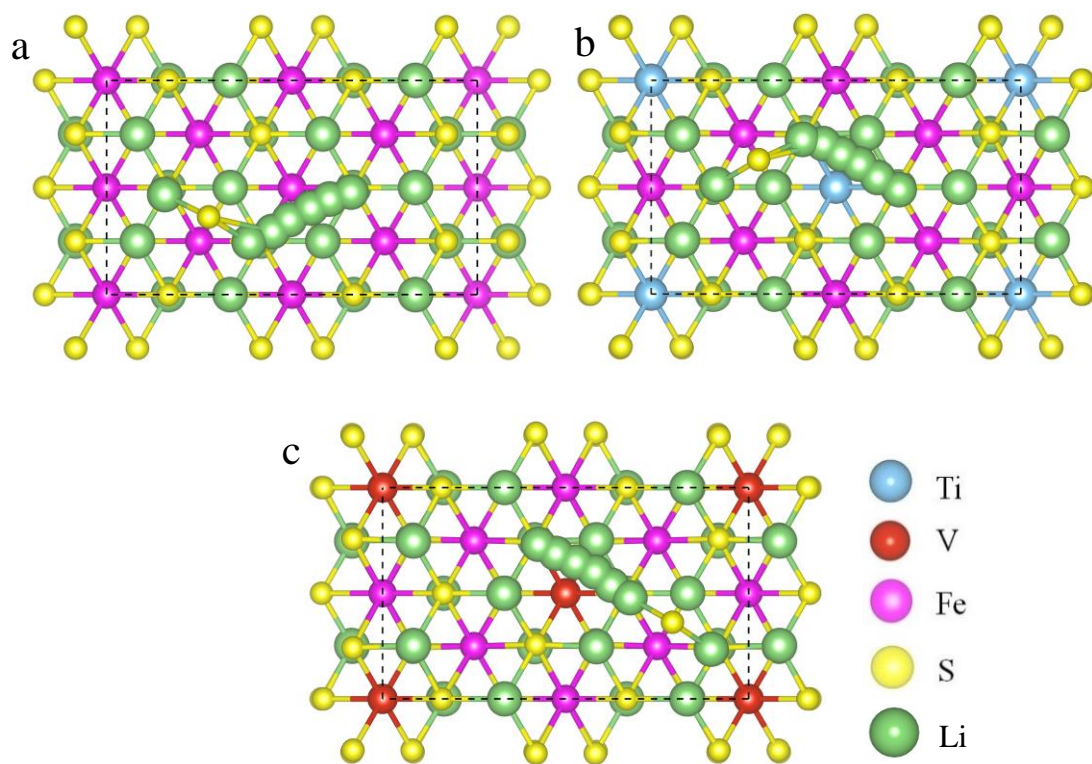

Supplement: d3cp04694j1.pdf [file d3cp04694j1.pdf]
